# Supplementary material for: The role of the mobile proton in fucose migration
Source: PubMed Central journal article supplement (PMC6611747; doi:10.1007/s00216-019-01657-w), 2019-03-02
Supplement: 216_2019_1657_MOESM1_ESM.pdf [file 216_2019_1657_MOESM1_ESM.pdf]

## **Analytical and Bioanalytical Chemistry**

### **Electronic Supplementary Material**

#### **The role of the mobile proton in fucose migration**

Maïke Lettow, Eike Mucha, Christian Manz, Daniel A. Thomas, Mateusz Marianski,  
Gerard Meijer, Gert von Helden, Kevin Pagel

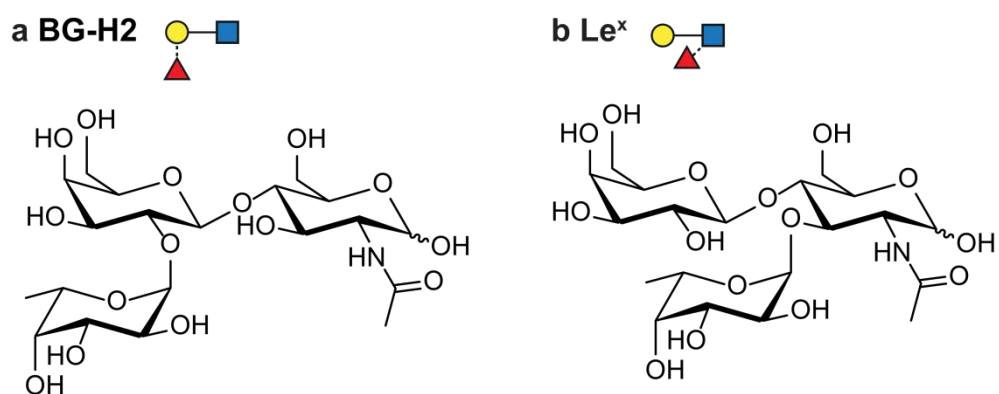

**Fig. S1** Chemical structures and SNFG representation of the investigated trisaccharides **a** Lewis x (Le<sup>x</sup>) and **b** blood group H-2 (BG-H2)
